# Supplementary material for: Small human islets comprised of more β-cells with higher insulin content than large islets
Source: PubMed Central journal article supplement — Islets. 2013 Mar 1;5(2):87–94. doi: 10.4161/isl.24780 (PMC4204020; doi:10.4161/isl.24780), 2013-03-01
Supplement: isl-5-87-s01.pdf [file isl-5-87-s01.pdf]

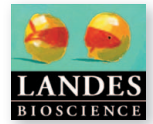

## **Supplemental Material to:**

**Bilal Farhat, Akshay Almelkar, Karthik Ramachandran, S. Janette Williams, Han-Hung Huang, David Zamierowski, Lesya Novikova and Lisa Stehno-Bittel**

**Small human islets comprised of more  $\beta$ -cells with higher insulin content than large islets**

**March/April 2013; Vol 5 (Issue 2)**

**<http://dx.doi.org/10.4161/isl.24780>**

**<http://www.landesbioscience.com/journals/islets/article/24780>**

**Table 1**

|                        | Variables                     | Donor #1     | Donor #2     |
|------------------------|-------------------------------|--------------|--------------|
| Insulin granule count  | r value                       | 0.86         | 0.80         |
|                        | p value                       | $4.67^{-10}$ | $8.48^{-6}$  |
|                        | sample size ( $\beta$ cells)  | 32           | 22           |
| Glucagon granule count | r value                       | 0.80         | 0.88         |
|                        | p value                       | $1.55^{-10}$ | $2.21^{-10}$ |
|                        | sample size ( $\alpha$ cells) | 43           | 30           |

Inter-rater reliability values for granule counts from electron micrographs.

**Supplemental Figure 1 (S1)**

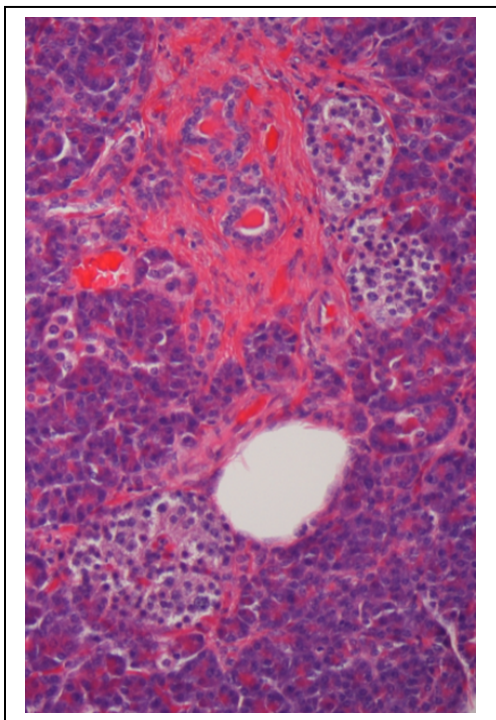

Hematoxylin and eosin staining of a pancreatic section from a 50 yo male. The image illustrates the penetration of blood vessels (red) into a large (lower left corner) and small islets (upper right) from a human pancreas. There was no difference in the percentage of islets with blood vessel penetration between the large and small islets. The large white spaces noted in the center was caused by fat deposition.

## Supplemental Figure 2 (S2)

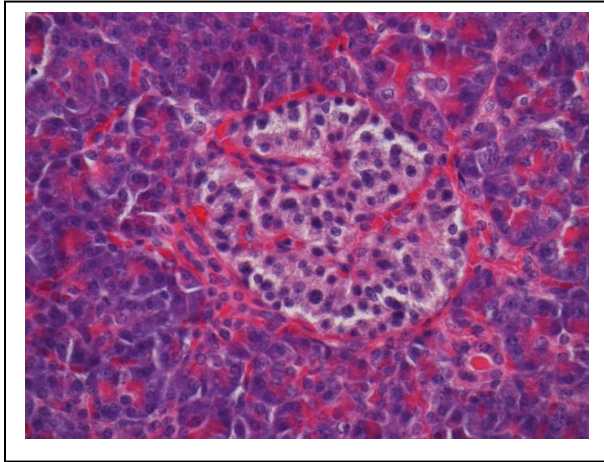

Hematoxylin and eosin staining of a pancreatic section, illustrating blood vessels (red) surrounding the islet and penetrating into the core, as also shown in Figure 3A of the manuscript.
